# Supplementary material for: Enhanced sensing performance of supported graphitic carbon nitride nanosheets and the fabrication of electrochemiluminescent biosensors for IgG
Source: Royal Society of Chemistry journal article supplement (doi:10.1039/c5an01244a), 2015-01-01
Supplement: c5an01244a1.pdf [file c5an01244a1.pdf]

## Supporting Information

### **Enhanced sensing performance of supported graphitic carbon nitride nanosheets and the fabrication of electrochemiluminescent biosensors for IgG**

Xiaojian Li, Hongmin Ma, Yong Zhang, Dan Wu, Xiaohui Lv, Bin Du, and Qin Wei\*

*Key Laboratory of Chemical Sensing & Analysis in Universities of Shandong, School of Chemistry and Chemical Engineering, University of Jinan, Jinan 250022, China*

\*Corresponding author. Tel.: +86 531 8276 7367. E-mail address: sdjndxwq@163.com (Qin Wei).

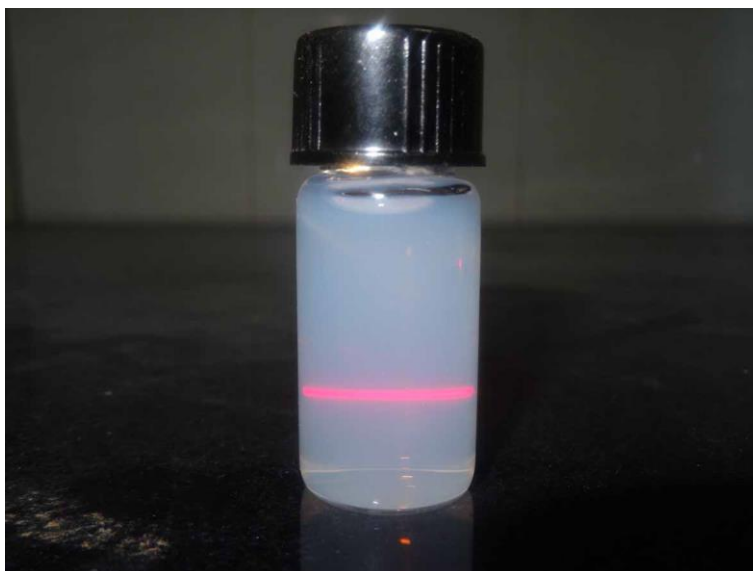

Figure S1. Photograph of colloidal dispersion of g-C<sub>3</sub>N<sub>4</sub> nanosheets in water.

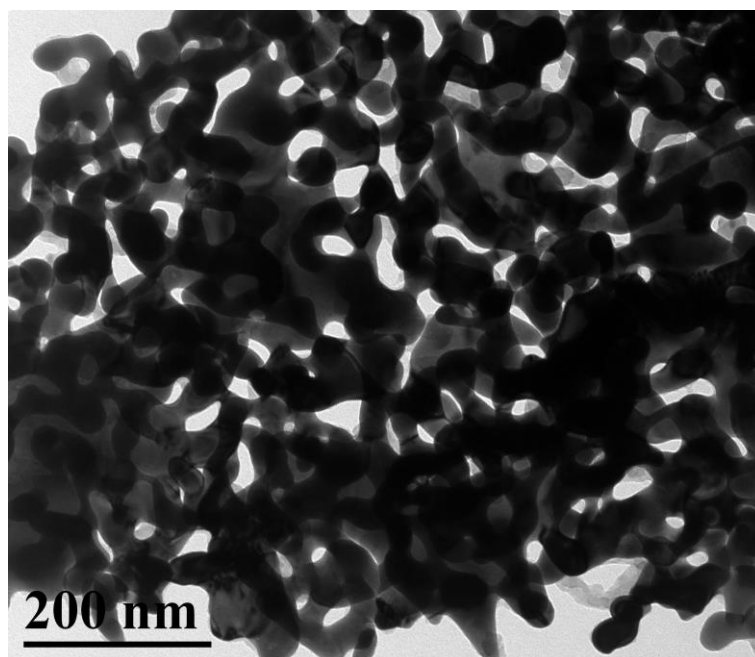

Figure S2. TEM image of NPG.

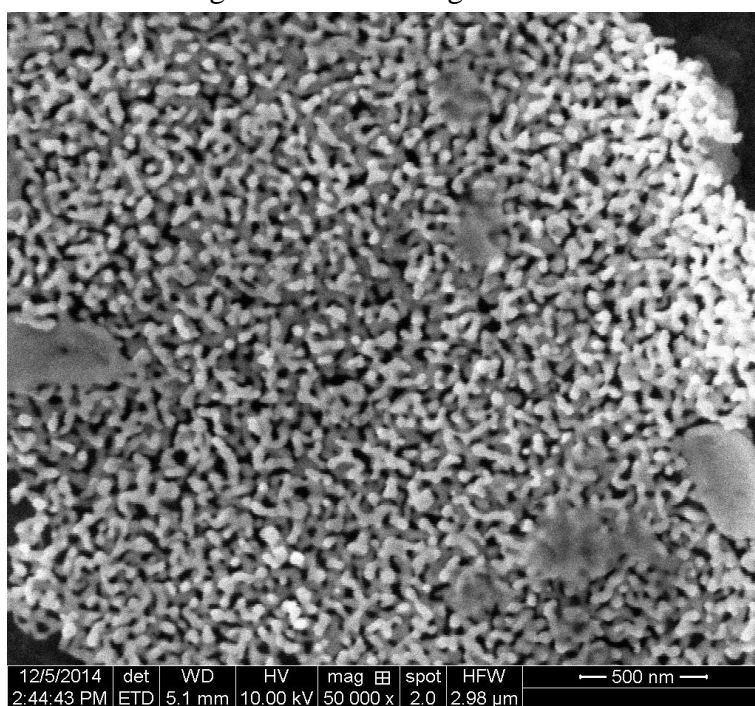

Figure S3. SEM image of g-C<sub>3</sub>N<sub>4</sub>@NPG.

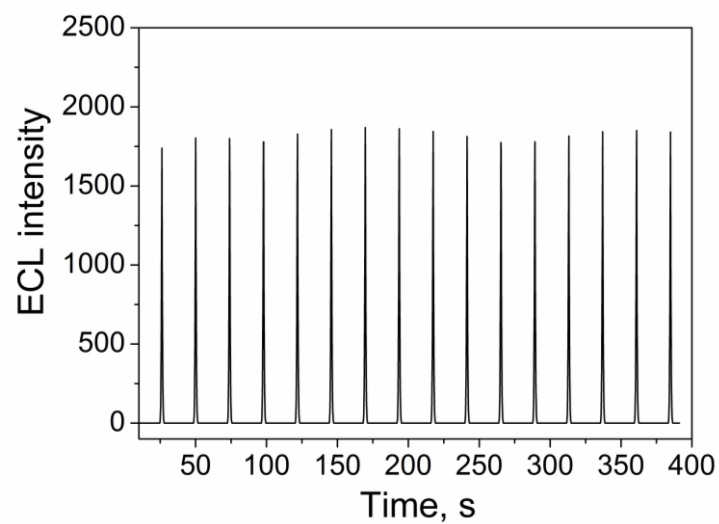

Figure S4. ECL emission from  $C_3N_4$ /GCE.

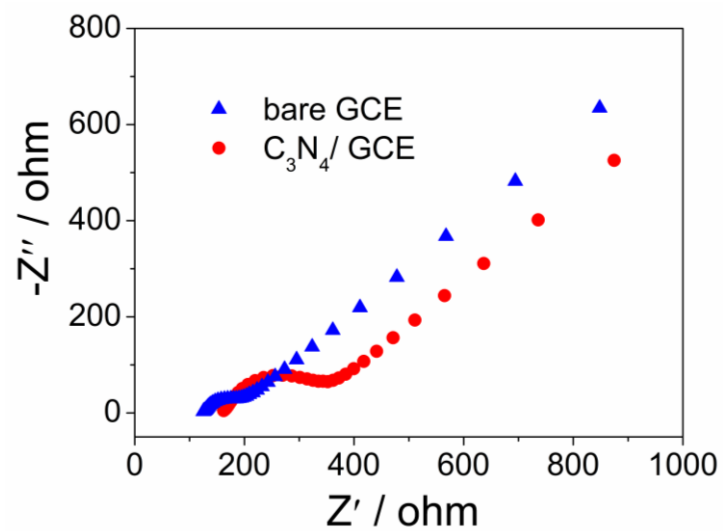

Figure S5. EIS of bare GCE and  $g-C_3N_4$ /GCE.

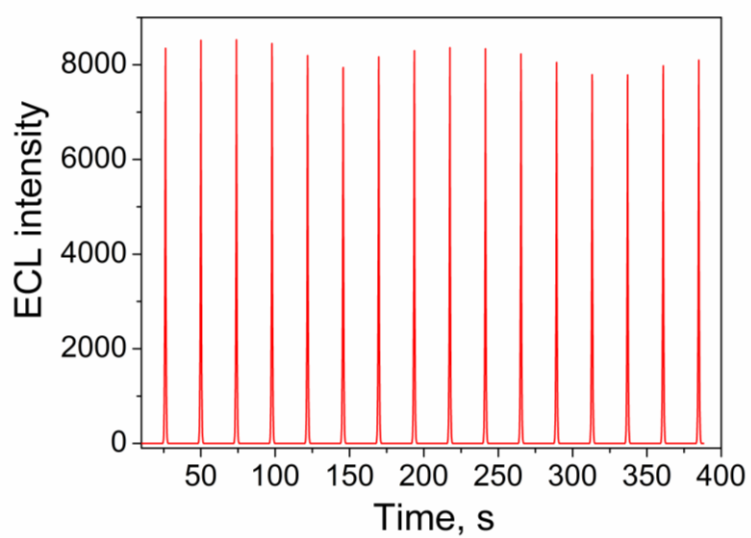

Figure S6. ECL emission from  $g-C_3N_4$ @NPG/GCE.

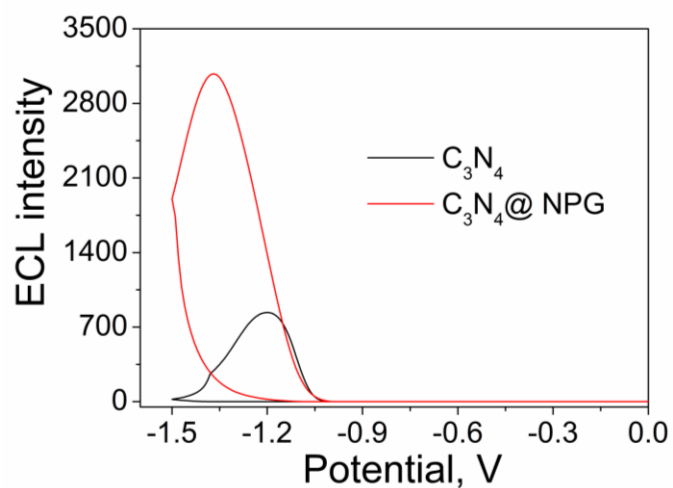

Figure S7. ECL responses obtained at g- $C_3N_4$ /GCE and g- $C_3N_4$ @NPG/GCE.

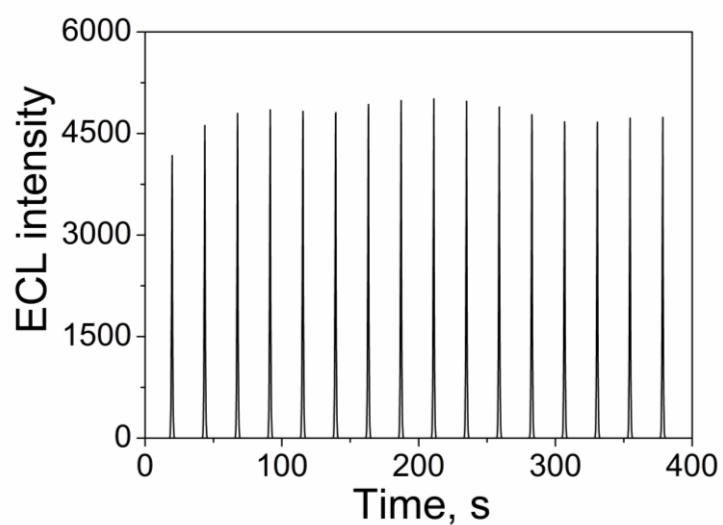

Figure S8. ECL emission from BSA/anti-IgG/ $C_3N_4$ @NPG/GCE.

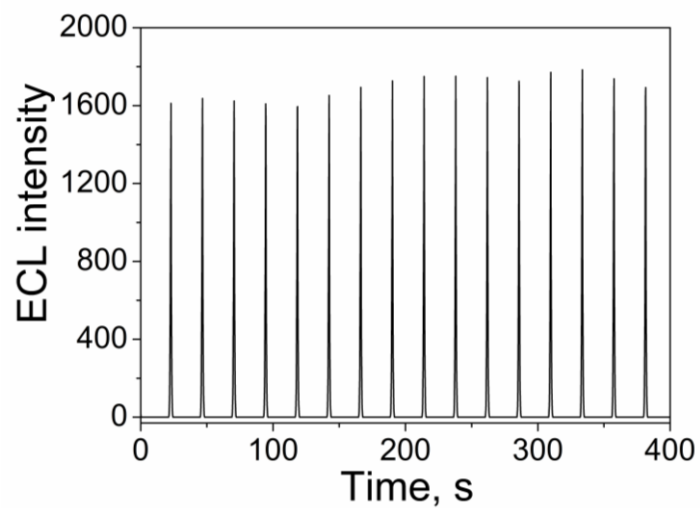

Figure S9. ECL emission from IgG/anti-IgG/g- $C_3N_4$ @NPG/GCE. The IgG concentration is  $5.0 \text{ ng} \cdot \text{mL}^{-1}$ .

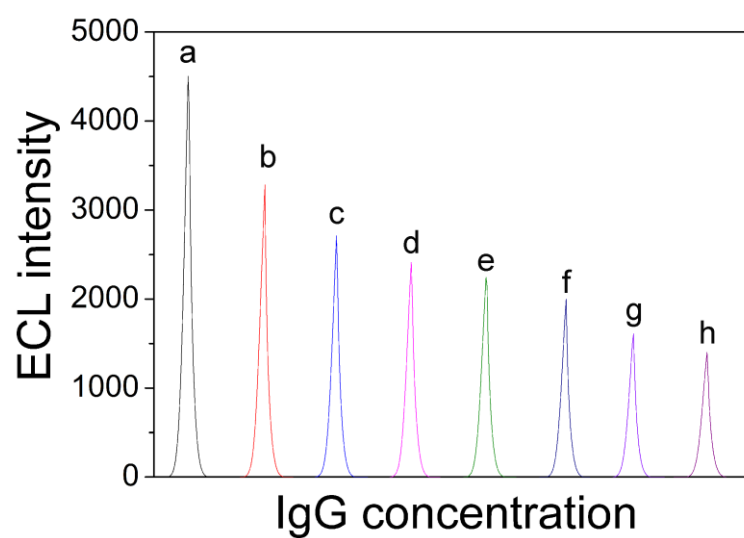

Figure S10. ECL emission from IgG/anti-IgG/g-C<sub>3</sub>N<sub>4</sub>@NPG/GCE. The IgG concentration is (a) 0.005, (b) 0.01, (c) 0.25, (d) 0.5, (e) 1.0, (f) 2.5, (g) 5.0, (h) 10.0 ng·mL<sup>-1</sup>.
